# Supplementary material for: Nutritional Influences on Locomotive Syndrome
Source: MDPI journal article supplement (doi:10.3390/jcm11030610), 2022-01-26
Supplement: s1 [file s1]

**Supplemental Table S1.** The comparison of all parameters between non-elderly and elderly participants.

|                               | All (n=368)  | Adult (n=163) | Older Adult (n=205) | p       |
|-------------------------------|--------------|---------------|---------------------|---------|
| Male/Female                   | 154/214      | 52/111        | 102/103             | 0.001*  |
| Age(yrs)                      | 63.8±10.5    | 54.3±7.3      | 71.3±5.3            | <0.001* |
| Height(cm)                    | 158.1±8.1    | 159.4±7.8     | 157±8.2             | 0.006*  |
| Weight(kg)                    | 59.2±11.5    | 59.6±12.3     | 58.9±10.8           | 0.553   |
| BMI(kg/m <sup>2</sup> )       | 23.5±3.5     | 23.3±3.6      | 23.7±3.4            | 0.231   |
| BFP (%)                       | 29.1±6.6     | 29.8±6.3      | 28.5±6.8            | 0.057   |
| SMI(kg/m <sup>2</sup> )       | 6.70±1.03    | 6.65±1.07     | 6.73±1.00           | 0.477   |
| Grip strength(kg)             | 26.9±8.8     | 27.1±9.4      | 26.7±8.2            | 0.730   |
| N/L                           | 156/212      | 71/92         | 85/120              | 0.383   |
| Hypertension(y/n)             | 140/228      | 31/132        | 109/96              | <0.001* |
| Diabetes(y/n)                 | 24/344       | 3/160         | 21/184              | 0.001*  |
| Hypertension(y/n)             | 140/228      | 31/132        | 109/96              | <0.001* |
| <b>Laboratory data</b>        |              |               |                     |         |
| White blood cell(/μL)         | 5.8±1.5      | 5.7±1.5       | 5.8±1.6             | 0.506   |
| Hemoglobin(g/dl)              | 13.5±1.2     | 13.4±1.3      | 13.6±1.1            | 0.175   |
| Platelet(10 <sup>4</sup> /μL) | 21.8±5.4     | 23±5.7        | 20.7±4.9            | <0.001* |
| HbA1c(%)                      | 5.7±0.5      | 5.5±0.4       | 5.8±0.5             | <0.001* |
| Total Protein(g/dl)           | 7.2±0.4      | 7.2±0.4       | 7.3±0.3             | 0.178   |
| Serum Albumin (g/dl)          | 4.4±0.2      | 4.4±0.2       | 4.3±0.2             | 0.183   |
| ALP(U/L)                      | 220.1±70.6   | 216.9±75.2    | 222.8±66.9          | 0.427   |
| AST (U/L)                     | 22.5±7.6     | 21.8±9.3      | 23±5.8              | 0.146   |
| ALT((U/L)                     | 22±12.2      | 22.7±14.9     | 21.4±9.4            | 0.308   |
| γ-glutamyltranspeptidase(U/L) | 31.2±34.7    | 35.1±46.5     | 28.1±20.6           | 0.055   |
| Total-cholesterol(mg/dl)      | 207.2±33.2   | 212.6±31.8    | 202.9±33.7          | 0.005*  |
| Triglyceride(mg/dl)           | 111.2±69.5   | 103.7±59.9    | 117.1±75.8          | 0.067   |
| HDL-C(mg/dl)                  | 61.5±14.9    | 62.9±14.5     | 60.4±15.1           | 0.103   |
| LDL-C(mg/dl)                  | 120.5±30.7   | 126.3±30.6    | 115.8±30            | 0.001*  |
| Blood urea nitrogen(mg/dl)    | 14.7±5.2     | 12.8±3.4      | 16.1±5.9            | <0.001* |
| Creatinine(mg/dl)             | 0.7±0.4      | 0.7±0.1       | 0.8±0.5             | 0.001*  |
| Uric acid(mg/dl)              | 5.2±1.3      | 5.1±1.3       | 5.4±1.2             | 0.037*  |
| Calcium(mg/dl)                | 9.2±0.3      | 9.2±0.3       | 9.2±0.3             | 0.726   |
| C-reactive protein(mg/dl)     | 0.09±0.18    | 0.07±0.09     | 0.11±0.22           | 0.071   |
| <b>Nutritional intake</b>     |              |               |                     |         |
| Energy(kcal/day)              | 1644.1±389.5 | 1591.1±351.2  | 1686.3±413.4        | 0.020*  |
| Protein(g/day)                | 53.3±13.7    | 51.5±10.8     | 54.8±15.6           | 0.022*  |
| Fat(g/day)                    | 44.6±13.5    | 42.9±12.2     | 46±14.3             | 0.031*  |
| Carbohydrate(g/day)           | 229.1±69.5   | 221.1±67.6    | 235.4±70.6          | 0.050   |
| Sodium(mg/day)                | 1972.3±689.4 | 1822.9±620.8  | 2091.1±719          | <0.001* |
| Potassium(mg/day)             | 2152.7±577.7 | 2027.2±447.7  | 2252.5±647.1        | <0.001* |

|                                |                |                |                |         |
|--------------------------------|----------------|----------------|----------------|---------|
| Calcium(mg/day)                | 543.9±191.6    | 502.7±150.7    | 576.7±213.5    | <0.001* |
| Iron(g/day)                    | 7.0±2.3        | 6.5±1.8        | 7.4±2.6        | <0.001* |
| Catotenenes(mg/day)            | 3056.1±1589.6  | 2721±1165.4    | 3322.5±1818.4  | <0.001* |
| VitaminA(μg/day)               | 855±587.3      | 821.2±665.3    | 881.9±517.2    | 0.325   |
| VitaminD(μg/day)               | 7.3±3.9        | 6.5±3.2        | 7.9±4.3        | 0.001v  |
| VitaminE(mg/day)               | 8.1±2.7        | 7.7±2.2        | 8.5±2.9        | 0.005*  |
| VitaminB1(mg/day)              | 0.67±0.09      | 0.67±0.08      | 0.67±0.09      | 0.918   |
| VitaminB2(mg/day)              | 1±0.3          | 1±0.2          | 1.1±0.3        | 0.001*  |
| Folate(μg/day)                 | 308.7±130.8    | 283.3±106.4    | 328.9±144.4    | 0.001*  |
| VitaminC(mg/day)               | 87.5±40.5      | 76.6±26.2      | 96.2±47.3      | <0.001* |
| SFA(g/day)                     | 11.6±2.9       | 11.1±2.4       | 11.9±3.2       | 0.011*  |
| MUFAd(g/day)                   | 16.4±4.8       | 16.1±4.8       | 16.6±4.8       | 0.293   |
| PUFA(g/day)                    | 13.2±4.5       | 12.5±4.0       | 13.8±4.9       | 0.009*  |
| Cholesterol(mg/day)            | 241.6±79.1     | 238.9±78.4     | 243.7±79.8     | 0.560   |
| Soluble dietary fiber(g/day)   | 2.1±0.7        | 1.9±0.5        | 2.2±0.8        | <0.001* |
| Insoluble dietary fiber(g/day) | 8.1±2.7        | 7.3±1.7        | 8.7±3.1        | <0.001* |
| Total dietary fiber(g/day)     | 11.4±3.8       | 10.3±2.8       | 12.3±4.3       | <0.001* |
| n-3 PUFA(g/day)                | 2299.2±750.9   | 2195±764.7     | 2382±731       | 0.017*  |
| n-6 PUFA(g/day)                | 11206.8±3901.2 | 10673.7±3523.9 | 11630.7±4136.5 | 0.019*  |
| Energy from alcohol(kcal/day)  | 47.2±96.7      | 49±101.5       | 45.7±92.9      | 0.742   |
| n-3 HUFAg/day)                 | 754.6±403.1    | 682.2±344.5    | 812.1±436.5    | 0.002*  |

Valuse are expressed as means ± standard deviations

BMI: body mass index, BFP: body fat percentage, SMI: skeletal muscle mass Index, y/n: yes/no

SMI: skeletal muscle mass Index, N/L: normal group/ locomotive syndrome group, y/n: yes/no

HDL-C: High density Lipoprotein Cholesterol, LDL-C: Low Density Lipoprotein Cholesterol

SFA: saturated fatty acid, MUFA: Monounsaturated fatty acid, PUFA: Polyunsaturated fatty acid, HUFA: Highly-unsaturated fatty acid

All analyses are comparisons between adult and older adult.

The comparisons of categorial variables were done by chi-square test, and the comparisons of continuous variables were done by student t-test.

\*:p<0.05

**Supplemental Table S2.** The comparison of all parameters between the N group and L group in adult participants.

|                               | Adult (n=163) | N (n=71)     | L (n=92)     | p      |
|-------------------------------|---------------|--------------|--------------|--------|
| Male/Female                   | 52/111        | 28/43        | 24/68        | 0.090  |
| Age(yrs)                      | 54.3±7.3      | 53.2±8       | 55.1±6.7     | 0.094  |
| BMI(kg/m2)                    | 23.3±3.6      | 22.8±3.3     | 23.7±3.8     | 0.164  |
| BFP (%)                       | 29.8±6.3      | 28.2±5.1     | 31.0±6.8     | 0.005* |
| SMI(kg/m2)                    | 6.65±1.07     | 6.72±1.04    | 6.60±1.09    | 0.489  |
| Grip strength(kg)             | 27.1±9.4      | 29.6±9.8     | 25.1±8.7     | 0.002* |
| Hypertension(y/n)             | 31/132        | 9/62         | 22/70        | 0.075  |
| Diabetes(y/n)                 | 3/160         | 3/68         | 0/92         | 0.081  |
| Hyperlipidemia(y/n)           | 27/136        | 11/60        | 16/76        | 0.833  |
| <b>Laboratory data</b>        |               |              |              |        |
| White blood cell(/μL)         | 5.7±1.5       | 5.8±1.7      | 5.7±1.4      | 0.595  |
| Hemoglobin(g/dl)              | 13.4±1.3      | 13.5±1.5     | 13.3±1.1     | 0.268  |
| Platelet(10 <sup>4</sup> /μL) | 23.0±5.7      | 23.0±6.3     | 23.1±5.3     | 0.910  |
| HbA1c(%)                      | 5.5±0.4       | 5.5±0.4      | 5.5±0.3      | 0.978  |
| Total Protein(g/dl)           | 7.2±0.4       | 7.3±0.4      | 7.2±0.3      | 0.066  |
| Serum Albumin (g/dl)          | 4.4±0.2       | 4.4±0.2      | 4.4±0.2      | 0.139  |
| ALP(U/L)                      | 216.9±75.2    | 215.1±77     | 218.2±74.1   | 0.800  |
| AST (U/L)                     | 21.8±9.3      | 21.4±7.6     | 22.2±10.5    | 0.624  |
| ALT((U/L)                     | 22.7±14.9     | 22.6±14.3    | 22.7±15.5    | 0.961  |
| γ-glutamyltranspeptidase(U/L) | 35.1±46.5     | 31.9±31.8    | 37.6±55.3    | 0.441  |
| Total-cholesterol(mg/dl)      | 212.6±31.8    | 216.2±36.9   | 209.8±27.2   | 0.205  |
| Triglyceride(mg/dl)           | 103.7±59.9    | 104.6±69.8   | 103.1±51.5   | 0.879  |
| HDL-C(mg/dl)                  | 62.9±14.5     | 61.8±14.7    | 63.8±14.4    | 0.397  |
| LDL-C(mg/dl)                  | 126.3±30.6    | 132.1±32.4   | 121.8±28.5   | 0.033  |
| Blood urea nitrogen(mg/dl)    | 12.8±3.4      | 12.9±3.2     | 12.8±3.6     | 0.825  |
| Creatinine(mg/dl)             | 0.7±0.1       | 0.7±0.1      | 0.6±0.1      | 0.224  |
| Uric acid(mg/dl)              | 5.1±1.3       | 5.1±1.3      | 5.1±1.3      | 0.888  |
| Calcium(mg/dl)                | 9.2±0.3       | 9.2±0.3      | 9.2±0.3      | 0.962  |
| C-reactive protein(mg/dl)     | 0.07±0.09     | 0.07±0.08    | 0.08±0.1     | 0.509  |
| <b>Nutritional intake</b>     |               |              |              |        |
| energy(kcal/day)              | 1591.1±351.2  | 1617.7±360.7 | 1570.6±344.4 | 0.397  |
| protein(g/day)                | 51.5±10.8     | 51.3±9       | 51.7±12      | 0.808  |
| fat(g/day)                    | 42.9±12.2     | 42.0±9.2     | 43.6±14.1    | 0.408  |
| carbohydrate(g/day)           | 221.1±67.6    | 228±71.9     | 215.7±63.9   | 0.251  |
| Sodium(mg/day)                | 1822.9±620.8  | 1879.4±612.3 | 1779.3±627.2 | 0.309  |
| Potassium(mg/day)             | 2027.2±447.7  | 2083.3±415.9 | 1983.9±468.5 | 0.161  |
| Calcium(mg/day)               | 502.7±150.7   | 507.8±152.7  | 498.8±149.8  | 0.708  |
| Iron(g/day)                   | 6.5±1.8       | 6.4±1.8      | 6.5±1.9      | 0.689  |

|                                |                |                |                |        |
|--------------------------------|----------------|----------------|----------------|--------|
| Catotenenes(mg/day)            | 2721±1165.4    | 2658.4±1130.7  | 2769.3±1195.3  | 0.549  |
| VitaminA(μg/day)               | 821.2±665.3    | 732.9±296.2    | 889.3±842.4    | 0.137  |
| VitaminD(μg/day)               | 6.5±3.2        | 6.1±2.5        | 6.8±3.6        | 0.138  |
| VitaminE(mg/day)               | 7.7±2.2        | 7.5±1.6        | 7.9±2.6        | 0.247  |
| VitaminB1(mg/day)              | 0.67±0.08      | 0.66±0.07      | 0.69±0.09      | 0.029  |
| VitaminB2(mg/day)              | 1.0±0.2        | 0.9±0.2        | 1.0±0.2        | 0.160  |
| Folate(μg/day)                 | 283.3±106.4    | 268.3±88.6     | 294.9±117.6    | 0.115  |
| VitaminC(mg/day)               | 76.6±26.2      | 73.4±24.4      | 79±27.4        | 0.178  |
| SFA(g/day)                     | 11.1±2.4       | 11.2±2.6       | 11.1±2.2       | 0.903  |
| MUFA(g/day)                    | 16.1±4.8       | 15.5±3.3       | 16.5±5.7       | 0.170  |
| PUFA(g/day)                    | 12.5±4         | 12.3±2.9       | 12.7±4.6       | 0.571  |
| Cholesterol(mg/day)            | 238.9±78.4     | 222.6±50.9     | 251.4±92.7     | 0.020* |
| Soluble dietary fiber(g/day)   | 1.9±0.5        | 1.9±0.5        | 1.8±0.6        | 0.878  |
| Insoluble dietary fiber(g/day) | 7.3±1.7        | 7.2±1.8        | 7.3±1.8        | 0.822  |
| Total dietary fiber(g/day)     | 10.3±2.8       | 10.2±2.8       | 10.3±2.8       | 0.892  |
| n-3 PUFA(g/day)                | 2195±764.7     | 2100.3±481.5   | 2268±922.2     | 0.166  |
| n-6 PUFA(g/day)                | 10673.7±3523.9 | 10579.5±2506.8 | 10746.4±4154.5 | 0.765  |
| Energy from alcohol(kcal/day)  | 49.0±101.5     | 39.2±67.3      | 56.6±121.4     | 0.280  |
| n-3 HUFA(g/day)                | 682.2±344.5    | 640±274.9      | 714.8±388.1    | 0.170  |

Valuse are expressed as means ± standard deviations. BMI: body mass index, BFP: body fat percentage, SMI: skeletal muscle mass Index, y/n: yes/no, ALP: alkaline phosphatase, AST: aspartate transaminase, ALT: alanine aminotransferase, HDL-C: High density Lipoprotein Cholesterol, LDL-C: Low Density Lipoprotein Cholesterol, SFA: saturated fatty acid, MUFA: Monounsaturated fatty acid, PUFA: Polyunsaturated fatty acid, HUFA: Highly-unsaturated fatty acid

All analyses are comparisons between N and L group.

The comparisons of categorial variables were done by chi-square test, and the comparisons of continuous variables were done by student t-test. \*:p<0.05

There were significant differences in BFP, Grip strength, Gate speed, LDL-C, and Vitamin B1 between N and L group.

**Supplemental Table S3.** The comparison of all parameters between the N group and L group in older adult participants.

|                               | Older Adult<br>(n=205) | N (n=85)     | L (n=120)    | p      |
|-------------------------------|------------------------|--------------|--------------|--------|
| male/female                   | 102/103                | 48/37        | 54/66        | 0.120  |
| Age(yrs)                      | 71.3±5.3               | 70.2±4.7     | 72.2±5.6     | 0.008* |
| BMI(kg/m2)                    | 23.7±3.4               | 23.2±3.4     | 24.1±3.3     | 0.061  |
| BFP (%)                       | 28.5±6.8               | 26.7±6.3     | 29.7±6.9     | 0.002* |
| SMI(kg/m2)                    | 6.73±1.00              | 6.86±1.06    | 6.64±0.95    | 0.140  |
| grip strength(kg)             | 26.7±8.2               | 29.0±8.0     | 25.1±8.0     | 0.001* |
| Hypertension(y/n)             | 109/96                 | 36/49        | 73/47        | 0.007* |
| Diabetes(y/n)                 | 21/184                 | 6/79         | 15/105       | 0.157  |
| Hyperlipidemia(y/n)           | 81/124                 | 36/49        | 45/75        | 0.305  |
| <b>Laboratory data</b>        |                        |              |              |        |
| White blood cell(/μL)         | 5.8±1.6                | 6.0±1.7      | 5.7±1.5      | 0.322  |
| Hemoglobin(g/dl)              | 13.6±1.1               | 13.8±1.0     | 13.4±1.1     | 0.036* |
| Platelet(10 <sup>4</sup> /μL) | 20.7±4.9               | 21.1±4.5     | 20.5±5.2     | 0.435  |
| HbA1c(%)                      | 5.8±0.5                | 5.8±0.4      | 5.8±0.5      | 0.496  |
| Total Protein(g/dl)           | 7.3±0.3                | 7.3±0.3      | 7.2±0.4      | 0.581  |
| Serum Albumin (g/dl)          | 4.3±0.2                | 4.4±0.2      | 4.3±0.2      | 0.030* |
| ALP(U/L)                      | 222.8±66.9             | 230±79.7     | 217.7±55.8   | 0.195  |
| AST (U/L)                     | 23±5.8                 | 23.3±5.9     | 22.8±5.8     | 0.494  |
| ALT((U/L)                     | 21.4±9.4               | 22.6±10.9    | 20.5±8.2     | 0.127  |
| γ-glutamyltranspeptidase(U/L) | 28.1±20.6              | 29.8±19.5    | 26.9±21.3    | 0.309  |
| Total-cholesterol(mg/dl)      | 202.9±33.7             | 205.3±35     | 201.2±32.8   | 0.399  |
| Triglyceride(mg/dl)           | 117.1±75.8             | 112.6±59.9   | 120.3±85.4   | 0.479  |
| HDL-C(mg/dl)                  | 60.4±15.1              | 61.1±15.3    | 59.8±15.0    | 0.55   |
| LDL-C(mg/dl)                  | 115.8±30               | 118.4±28.2   | 114±31.3     | 0.305  |
| Blood urea nitrogen(mg/dl)    | 16.1±5.9               | 16.2±6.7     | 16.0±5.3     | 0.801  |
| Creatinine(mg/dl)             | 0.8±0.5                | 0.8±0.6      | 0.8±0.4      | 0.452  |
| Uric acid(mg/dl)              | 5.4±1.2                | 5.3±1.1      | 5.4±1.3      | 0.366  |
| Calcium(mg/dl)                | 9.2±0.3                | 9.2±0.3      | 9.1±0.3      | 0.025* |
| C-reactive protein(mg/dl)     | 0.11±0.22              | 0.14±0.3     | 0.09±0.12    | 0.138  |
| <b>Nutritional intake</b>     |                        |              |              |        |
| energy(kcal/day)              | 1686.3±413.4           | 1638.8±348.7 | 1719.9±452   | 0.167  |
| protein(g/day)                | 54.8±15.6              | 52.9±11.6    | 56.2±17.8    | 0.132  |
| fat(g/day)                    | 46±14.3                | 44±12.1      | 47.4±15.6    | 0.090  |
| carbohydrate(g/day)           | 235.4±70.6             | 227.2±62     | 241.2±75.8   | 0.162  |
| Sodium(mg/day)                | 2091.1±719             | 1961.1±586.7 | 2183.1±789   | 0.029* |
| Potassium(mg/day)             | 2252.5±647.1           | 2168.1±490.4 | 2312.2±734.4 | 0.117  |
| Calcium(mg/day)               | 576.7±213.5            | 565.9±182.2  | 584.4±233.7  | 0.543  |
| Iron(g/day)                   | 7.4±2.6                | 7±1.9        | 7.7±2.9      | 0.059  |

|                                |                |                |                |        |
|--------------------------------|----------------|----------------|----------------|--------|
| catotenes(mg/day)              | 3322.5±1818.4  | 3101.9±1422.6  | 3478.8±2044.6  | 0.144  |
| VitaminA(μg/day)               | 881.9±517.2    | 826.2±355.7    | 921.4±604.5    | 0.195  |
| VitaminD(μg/day)               | 7.9±4.3        | 7.6±2.6        | 8.2±5.2        | 0.306  |
| VitaminE(mg/day)               | 8.5±2.9        | 8.1±2.1        | 8.8±3.4        | 0.099  |
| VitaminB1(mg/day)              | 0.67±0.09      | 0.66±0.08      | 0.68±0.10      | 0.114  |
| VitaminB2(mg/day)              | 1.1±0.3        | 1.0±0.3        | 1.1±0.3        | 0.286  |
| Folate(μg/day)                 | 328.9±144.4    | 309.4±100.0    | 342.6±167.9    | 0.105  |
| VitaminC(mg/day)               | 96.2±47.3      | 88.7±37.9      | 101.6±52.4     | 0.054  |
| SFA(g/day)                     | 11.9±3.2       | 11.8±3.1       | 12.0±3.3       | 0.720  |
| MUFA(g/day)                    | 16.6±4.8       | 15.8±3.8       | 17.2±5.4       | 0.047* |
| PUFA(g/day)                    | 13.8±4.9       | 13.0±3.3       | 14.3±5.7       | 0.063  |
| Cholesterol(mg/day)            | 243.7±79.8     | 234.4±64.3     | 250.3±88.9     | 0.161  |
| Soluble dietary fiber(g/day)   | 2.2±0.8        | 2.1±0.7        | 2.3±0.9        | 0.063  |
| Insoluble dietary fiber(g/day) | 8.7±3.1        | 8.2±2.4        | 9.1±3.5        | 0.065  |
| Total dietary fiber(g/day)     | 12.3±4.3       | 11.6±3.5       | 12.8±4.8       | 0.050  |
| n-3 PUFA(g/day)                | 2382±731       | 2271.3±518.1   | 2460.4±843.6   | 0.068  |
| n-6 PUFA(g/day)                | 11630.7±4136.5 | 10898.3±2808.4 | 12149.4±4807.4 | 0.033* |
| Energy from alcohol(kcal/day)  | 45.7±92.9      | 51.9±87.2      | 41.3±96.9      | 0.426  |
| n-3 HUFA(g/day)                | 812.1±436.5    | 781±274.1      | 834.1±522      | 0.393  |

Valuse are expressed as means ± standard deviations. BMI: body mass index, BFP: body fat percentage, SMI: skeletal muscle mass Index, y/n: yes/no, ALP: alkaline phosphatase, AST: aspartate transaminase, ALT: alanine aminotransferase, HDL-C: High density Lipoprotein Cholesterol, LDL-C: Low Density Lipoprotein Cholesterol, SFA: saturated fatty acid, MUFA: Monounsaturated fatty acid, PUFA: Polyunsaturated fatty acid, HUFA: Highly-unsaturated fatty acid

All analyses are comparisons between N and L group.

The comparisons of categorial variables were done by chi-square test, and the comparisons of continuous variables were done by student t-test. \*:p<0.05

There were significant differences in BFP, Grip strength, Gate speed, LDL-C, and Vitamin B1 between N and L group.
